# Supplementary material for: Uncertain Henry's law constants compromise equilibrium partitioning calculations of atmospheric oxidation products
Source: Copernicus journal article supplement (doi:10.5194/acp-17-7529-2017), 2017-06-22
Supplement: Supplementary file 1 [file acp-17-7529-2017-supplement.zip]

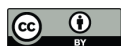

## *Supplement of*

# **Uncertain Henry's law constants compromise equilibrium partitioning calculations of atmospheric oxidation products**

**Chen Wang et al.**

*Correspondence to:* Frank Wania ([frank.wania@utoronto.ca](mailto:frank.wania@utoronto.ca))

- [acp-17-7529-2017-supplement-title-page.pdf](#)
- [Supporting information CSV.csv](#)
- [Supporting information revised may16.pdf](#)

The copyright of individual parts of the supplement might differ from the CC BY 3.0 License.
